# Supplementary material for: A comparison of the Muenster, SIOP Boston, Brock, Chang and CTCAEv4.03 ototoxicity grading scales applied to 3,799 audiograms of childhood cancer patients treated with platinum-based chemotherapy
Source: PubMed Central journal article supplement (PMC6375552; doi:10.1371/journal.pone.0210646), 2019-02-14
Supplement: pone.0210646.s001.pdf [file pone.0210646.s001.pdf]

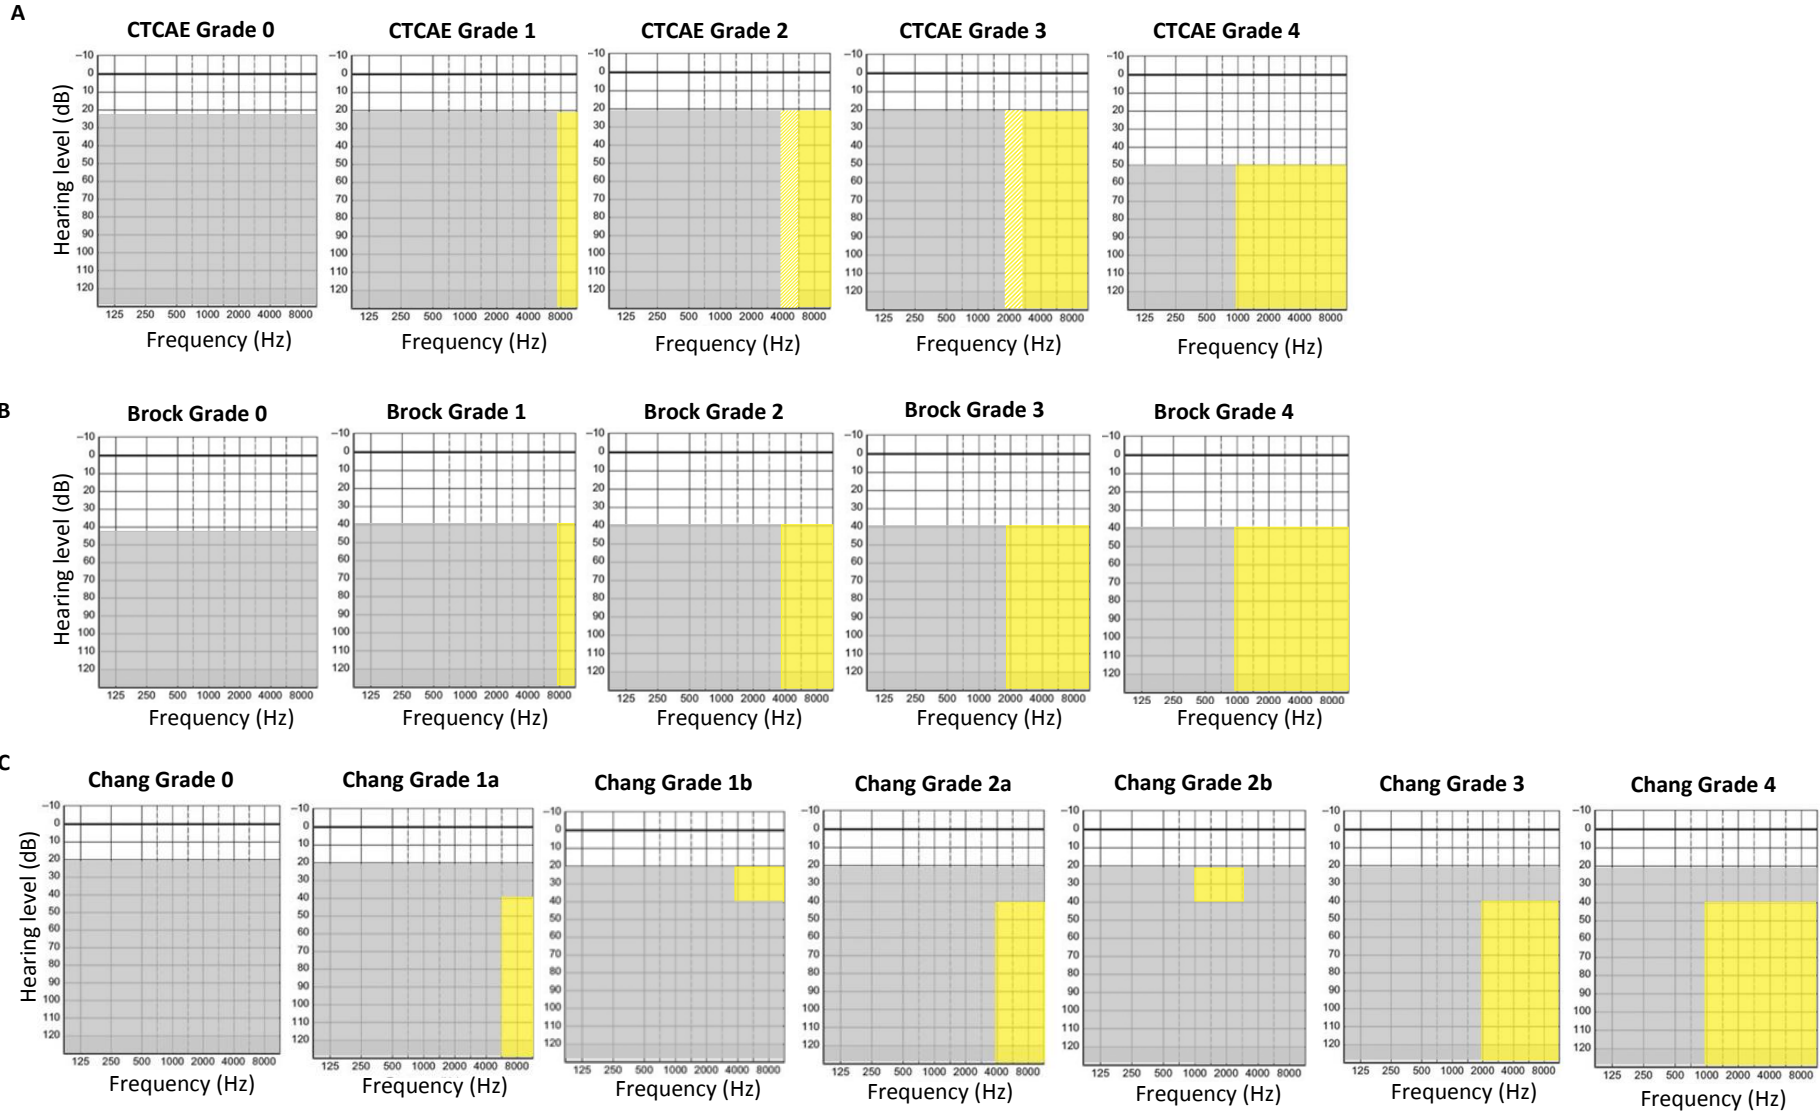

D

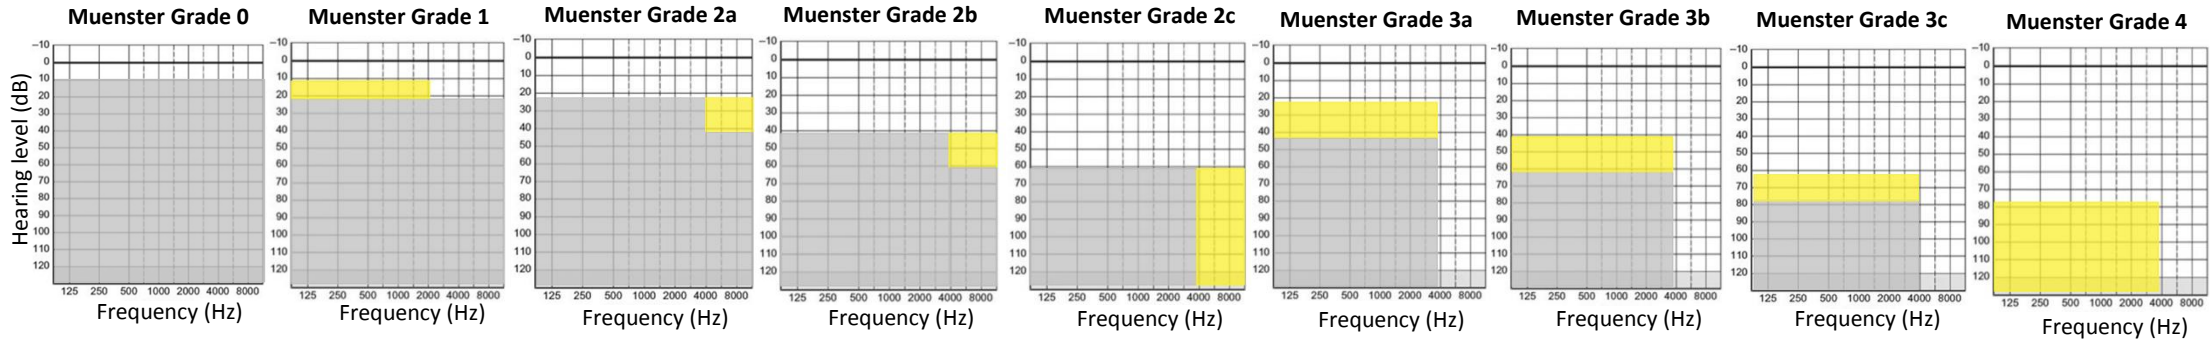

E

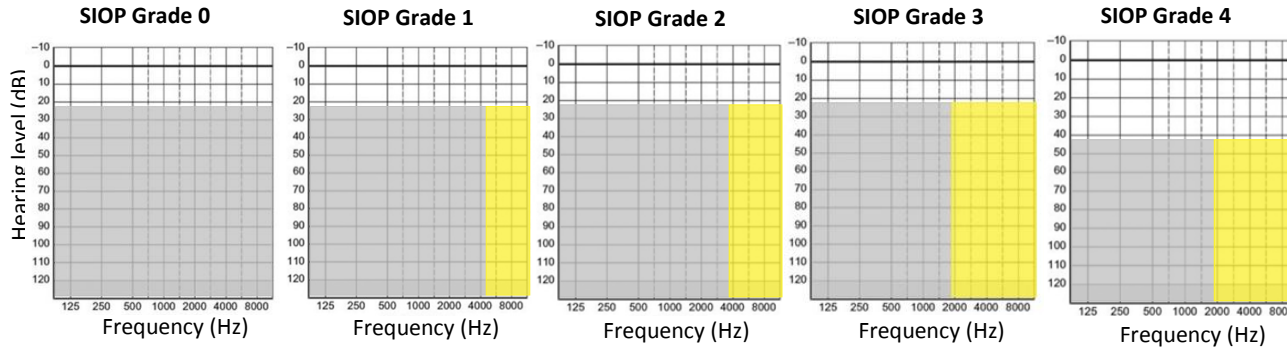

**S1 Figure. Schematic overview of classification systems.** U.S. National Cancer Institute Common Technology Criteria for Adverse Events version 4.03 (CTCAEv4.03) grading scale (A), Brock grading scale (B), Chang grading scale (C), Muenster grading scale (D) and SIOP grading scale (E). The yellow part depicts the area where hearing loss is defined.
