# Supplementary material for: A comparison of the Muenster, SIOP Boston, Brock, Chang and CTCAEv4.03 ototoxicity grading scales applied to 3,799 audiograms of childhood cancer patients treated with platinum-based chemotherapy
Source: PubMed Central journal article supplement (PMC6375552; doi:10.1371/journal.pone.0210646), 2019-02-14
Supplement: pone.0210646.s002.pdf [file pone.0210646.s002.pdf]

|              |             | SIOP Boston |            |            |            |             |            |
|--------------|-------------|-------------|------------|------------|------------|-------------|------------|
| Muenster     |             | 0           | 1          | 2          | 3          | 4           | Total      |
|              | <b>0</b>    | 744         | 9          | 1          | 0          | 0           | <b>754</b> |
|              | <b>1</b>    | 510         | 20         | 9          | 1          | 0           | <b>540</b> |
|              | <b>2a</b>   | 36          | 310        | 58         | 22         | 2           | <b>428</b> |
|              | <b>2b</b>   | 5           | 261        | 139        | 45         | 9           | <b>459</b> |
|              | <b>2c</b>   | 0           | 139        | 309        | 42         | 8           | <b>498</b> |
|              | <b>3a</b>   | 0           | 1          | 11         | 263        | 21          | <b>296</b> |
|              | <b>3b</b>   | 0           | 0          | 2          | 246        | 185         | <b>433</b> |
|              | <b>3c</b>   | 0           | 0          | 0          | 63         | 145         | <b>208</b> |
|              | <b>4</b>    | 0           | 0          | 0          | 4          | 174         | <b>187</b> |
| <b>Total</b> | <b>1295</b> | <b>740</b>  | <b>529</b> | <b>687</b> | <b>543</b> | <b>3794</b> |            |

|              |             | Brock      |            |            |            |             |            |
|--------------|-------------|------------|------------|------------|------------|-------------|------------|
| Muenster     |             | 0          | 1          | 2          | 3          | 4           | Total      |
|              | <b>0</b>    | 754        | 0          | 0          | 0          | 0           | <b>754</b> |
|              | <b>1</b>    | 536        | 2          | 1          | 1          | 0           | <b>540</b> |
|              | <b>2a</b>   | 319        | 88         | 13         | 3          | 2           | <b>425</b> |
|              | <b>2b</b>   | 3          | 359        | 88         | 6          | 6           | <b>462</b> |
|              | <b>2c</b>   | 1          | 232        | 258        | 1          | 5           | <b>497</b> |
|              | <b>3a</b>   | 1          | 27         | 220        | 32         | 12          | <b>292</b> |
|              | <b>3b</b>   | 0          | 1          | 234        | 160        | 38          | <b>433</b> |
|              | <b>3c</b>   | 0          | 1          | 55         | 126        | 26          | <b>208</b> |
|              | <b>4</b>    | 0          | 0          | 1          | 83         | 94          | <b>178</b> |
| <b>Total</b> | <b>1614</b> | <b>710</b> | <b>870</b> | <b>412</b> | <b>183</b> | <b>3789</b> |            |

|              |             | Chang      |            |            |            |            |            |             |            |
|--------------|-------------|------------|------------|------------|------------|------------|------------|-------------|------------|
| Muenster     |             | 0          | 1a         | 1b         | 2a         | 2b         | 3          | 4           | Total      |
|              | <b>0</b>    | 753        | 0          | 1          | 0          | 0          | 0          | 0           | <b>754</b> |
|              | <b>1</b>    | 53         | 3          | 1          | 1          | 0          | 1          | 0           | <b>539</b> |
|              | <b>2a</b>   | 290        | 80         | 29         | 4          | 18         | 2          | 3           | <b>426</b> |
|              | <b>2b</b>   | 5          | 265        | 91         | 51         | 31         | 13         | 6           | <b>462</b> |
|              | <b>2c</b>   | 0          | 147        | 85         | 222        | 26         | 11         | 6           | <b>497</b> |
|              | <b>3a</b>   | 0          | 2          | 21         | 3          | 154        | 98         | 14          | <b>292</b> |
|              | <b>3b</b>   | 0          | 1          | 1          | 0          | 1          | 389        | 41          | <b>433</b> |
|              | <b>3c</b>   | 0          | 0          | 0          | 0          | 1          | 175        | 32          | <b>208</b> |
|              | <b>4</b>    | 0          | 0          | 0          | 0          | 0          | 81         | 97          | <b>178</b> |
| <b>Total</b> | <b>1581</b> | <b>498</b> | <b>229</b> | <b>281</b> | <b>231</b> | <b>770</b> | <b>199</b> | <b>3789</b> |            |

|      |              | Brock       |            |            |            |            |             |
|------|--------------|-------------|------------|------------|------------|------------|-------------|
| SIOP |              | 0           | 1          | 2          | 3          | 4          | Total       |
|      | <b>0</b>     | 1287        | 6          | 1          | 1          | 0          | <b>1295</b> |
|      | <b>1</b>     | 271         | 466        | 2          | 1          | 0          | <b>740</b>  |
|      | <b>2</b>     | 44          | 185        | 291        | 4          | 1          | <b>525</b>  |
|      | <b>3</b>     | 12          | 51         | 555        | 57         | 7          | <b>683</b>  |
|      | <b>4</b>     | 0           | 1          | 19         | 349        | 174        | <b>543</b>  |
|      | <b>Total</b> | <b>1614</b> | <b>709</b> | <b>869</b> | <b>412</b> | <b>182</b> | <b>3786</b> |

|      |              | Chang       |            |            |            |            |            |            |             |
|------|--------------|-------------|------------|------------|------------|------------|------------|------------|-------------|
| SIOP |              | 0           | 1a         | 1b         | 2a         | 2b         | 3          | 4          | Total       |
|      | <b>0</b>     | 1283        | 9          | 1          | 1          | 1          | 0          | 0          | <b>1295</b> |
|      | <b>1</b>     | 265         | 465        | 8          | 0          | 1          | 1          | 0          | <b>740</b>  |
|      | <b>2</b>     | 27          | 20         | 188        | 268        | 16         | 6          | 1          | <b>526</b>  |
|      | <b>3</b>     | 6           | 3          | 30         | 12         | 211        | 408        | 12         | <b>682</b>  |
|      | <b>4</b>     | 0           | 1          | 0          | 0          | 2          | 355        | 185        | <b>543</b>  |
|      | <b>Total</b> | <b>1581</b> | <b>498</b> | <b>227</b> | <b>281</b> | <b>231</b> | <b>770</b> | <b>198</b> | <b>3786</b> |

|              |             | Chang      |            |            |            |            |            |             |       |
|--------------|-------------|------------|------------|------------|------------|------------|------------|-------------|-------|
| Brock        |             | 0          | 1a         | 1b         | 2a         | 2b         | 3          | 4           | Total |
|              | 0           | 1560       | 22         | 22         | 3          | 6          | 0          | 0           | 1613  |
|              | 1           | 17         | 471        | 195        | 1          | 24         | 2          | 0           | 710   |
|              | 2           | 3          | 3          | 10         | 277        | 198        | 372        | 6           | 869   |
|              | 3           | 1          | 2          | 1          | 0          | 2          | 394        | 12          | 412   |
|              | 4           | 0          | 0          | 0          | 0          | 0          | 2          | 181         | 183   |
| <b>Total</b> | <b>1581</b> | <b>498</b> | <b>228</b> | <b>281</b> | <b>230</b> | <b>770</b> | <b>199</b> | <b>3787</b> |       |

|              |            | Muenster  |           |           |           |           |           |           |           |            |       |
|--------------|------------|-----------|-----------|-----------|-----------|-----------|-----------|-----------|-----------|------------|-------|
| CTCAEv4.03   |            | 0         | 1         | 2a        | 2b        | 2c        | 3a        | 3b        | 3c        | 4          | Total |
|              | 0          | 105       | 62        | 3         | 0         | 1         | 0         | 0         | 0         | 0          | 171   |
|              | 1          | 0         | 0         | 23        | 19        | 7         | 0         | 0         | 0         | 1          | 50    |
|              | 2          | 0         | 0         | 7         | 55        | 60        | 7         | 1         | 1         | 2          | 133   |
|              | 3          | 0         | 0         | 0         | 0         | 1         | 43        | 59        | 27        | 24         | 154   |
|              | 4          | 0         | 0         | 0         | 0         | 0         | 0         | 1         | 1         | 12         | 14    |
| <b>Total</b> | <b>105</b> | <b>62</b> | <b>33</b> | <b>74</b> | <b>69</b> | <b>50</b> | <b>61</b> | <b>29</b> | <b>39</b> | <b>522</b> |       |

|              |            | SIOP Boston |           |           |           |            |       |
|--------------|------------|-------------|-----------|-----------|-----------|------------|-------|
| CTCAEv4.03   |            | 0           | 1         | 2         | 3         | 4          | Total |
|              | 0          | 166         | 4         | 0         | 0         | 1          | 171   |
|              | 1          | 0           | 48        | 1         | 0         | 1          | 50    |
|              | 2          | 1           | 48        | 71        | 6         | 6          | 132   |
|              | 3          | 0           | 0         | 0         | 91        | 63         | 154   |
|              | 4          | 0           | 0         | 0         | 0         | 14         | 14    |
| <b>Total</b> | <b>167</b> | <b>100</b>  | <b>72</b> | <b>97</b> | <b>85</b> | <b>521</b> |       |

|              |            | Brock      |            |           |           |            |       |
|--------------|------------|------------|------------|-----------|-----------|------------|-------|
| CTCAEv4.03   |            | 0          | 1          | 2         | 3         | 4          | Total |
|              | 0          | 170        | 0          | 1         | 0         | 0          | 171   |
|              | 1          | 17         | 31         | 1         | 0         | 1          | 50    |
|              | 2          | 4          | 73         | 51        | 2         | 3          | 133   |
|              | 3          | 0          | 4          | 78        | 57        | 14         | 153   |
|              | 4          | 0          | 0          | 0         | 3         | 11         | 14    |
| <b>Total</b> | <b>191</b> | <b>108</b> | <b>131</b> | <b>62</b> | <b>29</b> | <b>521</b> |       |

|              |            | Chang     |           |           |           |            |           |            |       |
|--------------|------------|-----------|-----------|-----------|-----------|------------|-----------|------------|-------|
| CTCAEv4.03   |            | 0         | 1a        | 1b        | 2a        | 2b         | 3         | 4          | Total |
|              | 0          | 170       | 0         | 0         | 0         | 0          | 1         | 0          | 171   |
|              | 1          | 16        | 32        | 0         | 1         | 0          | 0         | 1          | 50    |
|              | 2          | 3         | 48        | 27        | 43        | 5          | 4         | 3          | 133   |
|              | 3          | 0         | 0         | 3         | 0         | 27         | 108       | 15         | 153   |
|              | 4          | 0         | 0         | 0         | 0         | 0          | 3         | 11         | 14    |
| <b>Total</b> | <b>189</b> | <b>80</b> | <b>30</b> | <b>44</b> | <b>32</b> | <b>116</b> | <b>30</b> | <b>521</b> |       |

**S2 Figure. Cross tables of classification systems.** Number of audiograms graded according to the U.S. National Cancer Institute Common Technology Criteria for Adverse Events version 4.03 (CTCAEv4.03), Brock, Chang, Muenster and SIOP grading scale.
